# Supplementary material
Source: PubMed Central journal article supplement (PMC4976026)

**1 Supplementary material**

2

**3 Case 1: II.2 (C244T/C244T)**

4 A 9 year-old female born to a first cousin consanguineous union had an otherwise  
5 unremarkable medical and developmental history other than having received a  
6 routine course of isoniazid treatment at age 3 for having had contact with an active  
7 case of tuberculosis. At age 9, she presented with intermittent fever treated with  
8 oral antibiotics for suspected bacterial infections. One week later, she presented  
9 with 2 days of fever, ataxic gait and slurred speech. She had upward and lateral gaze  
10 nystagmus, generalized hypotonia, bilateral tremors, and head titubation with intact  
11 cranial nerves. She required intensive care and mechanically assisted ventilation.  
12 Peripheral hematological counts were: normal Hemoglobin (Hb), white blood cell  
13 count (WBC) of 3,700 cells/ $\mu$ L (absolute neutrophil count (ANC) 1,665 cells/ $\mu$ L, and  
14 absolute lymphocyte count (ALC) 1,998 cells/ $\mu$ L) and 350,000/ $\mu$ L platelets. Except  
15 for elevated protein (600 mg/L), cerebrospinal fluid (CSF) was normal and negative  
16 for bacteria, mycobacteria, and fungi. Serum and CSF were negative for  
17 cytomegalovirus (CMV), herpes simplex virus, enteroviruses and varicella virus by  
18 PCR. Head CT scans were normal and she was treated with one dose of IVIG for  
19 suspected Guillain-Barré syndrome and 10 days of intravenous ceftriaxone,  
20 azithromycin and acyclovir. Fever persisted (40°C) and she was diagnosed with  
21 pneumonia. One week later, she developed worsening ataxia and speech with  
22 profound right-sided hypotonia, loss of consciousness, loss of gag and abdominal  
23 reflexes, dilated but reactive pupils and she required assisted ventilation. Hb was  
24 10.6 g/dL, WBC of 1,650 cells/ $\mu$ L (ANC 501 cells/ $\mu$ L, ALC 890 cells/ $\mu$ L), and  
25 platelets of 131,000/ $\mu$ L. Serum ferritin and triglycerides were normal. Head  
26 magnetic resonance imaging (MRI) showed meningoencephalitis with predominant  
27 posterior fossa involvement. Bone marrow aspirate revealed hypocellularity and  
28 only evidence of reactivity without other abnormality. Her immunoglobulin levels  
29 were normal, with the exception of elevated IgE (440 Ku/L). Analysis of CSF  
30 demonstrated elevated protein (1.08 g/L) without cells and no bacterial growth.  
31 Lymphocyte subsets analysis was remarkable for lymphopenia (ALC 880 cells/ $\mu$ L),

32 with 95% CD3<sup>+</sup> T cells (863 cells/ $\mu$ L), 52% CD4<sup>+</sup> T cells (458 cells/ $\mu$ L), 40% CD8<sup>+</sup> T  
33 cells (352 cells/ $\mu$ L), 2% CD19<sup>+</sup> B cells (176 cells/ $\mu$ L), and 0.7% CD56<sup>+</sup> NK cells  
34 (62 cells/ $\mu$ L). She developed pulmonary hemorrhage and ganciclovir treatment was  
35 started providing owing to CMV having been identified in her bronchoalveolar  
36 lavage (BAL) specimen.

37 Four months later, head MRI was repeated and demonstrated generalized large  
38 lesions in right frontal lobe as well as extensive low attenuation changes within the  
39 midbrain. An open lung biopsy was performed and histological examination  
40 identified only lymphocytic interstitial pneumonia. She was presumed to have and  
41 was treated for hemophagocytic lymphohistiocytosis (HLH) with high-dose of  
42 dexamethasone, anti-thymocyte globulin (ATG), mycophenolate mofetil (MMF) and  
43 alemtuzumab (anti-CD25 mAb). She was weaned from ventilator support but she  
44 had bulbar palsy, left-sided hemiplegia, and ataxia and required a tracheotomy with  
45 ongoing mechanical ventilatory assistance. Several months thereafter she was  
46 diagnosed with septic shock and died due to acute respiratory distress syndrome.  
47 Sanger sequencing for *RAB27A* detected that the patient was homozygous for  
48 c.244C>T (p.R82C) which retrospectively confirmed the diagnosis of HLH.

49

50

51 **Case 2: II.1 (??)**

52 A 10 year-old male was previously generally healthy and like his sister (Case 1) was  
53 treated with INH prophylaxis for an exposure to active tuberculosis. He had the  
54 additional medical history at age 6 of needing treatment for brucellosis (*B.*  
55 *melitensis* titer 1:5,120) with 3 weeks of rifampicin and trimethoprim-  
56 sulfamethoxazole (TMP-SMZ). At age 10, he developed fever with hemoglobin (Hb)  
57 of 8.9 g/dL, WBC was 2,400 cells/ $\mu$ L (ANC of 800 cells/ $\mu$ L, ALC of 1,300 cells/ $\mu$ L),  
58 platelets of 121,000/ $\mu$ L and serum ferritin of 81  $\mu$ g/L. One week later, he developed  
59 hepatosplenomegaly, with normal liver function test (LFTs). After three months, he  
60 developed mild jaundice with a serum unconjugated bilirubin of 60  $\mu$ mol/L, and  
61 conjugated bilirubin <2.0. Serum PCR was negative for adenovirus, CMV, and  
62 Epstein-Barr Virus (EBV). Serum IgG was 1,200 mg/dL, IgA at 147mg/dL, and IgM of  
63 107 mg/dL. He was treated with oral prednisolone, cyclosporine, TMP-SMZ  
64 prophylaxis and IVIG. The hepatosplenomegaly improved thereafter with  
65 normalizing cell counts (except for platelets of 121,000/ $\mu$ L). At 11 years of age he  
66 developed headache, diplopia, and muscle weakness with preference for lower  
67 extremities. Head MRI demonstrated hemorrhagic lesions in the frontal and non-  
68 hemorrhagic lesions in the right mesial lobes. Serum virological studies detected  
69 EBV DNA (1,779 copies/ml). CSF cultures including those for acid-fast bacilli as well  
70 as PCR for enteroviruses, John Cunningham virus (JCV), BK virus and parvovirus  
71 B19 were all negative. His skin biopsy and that of his sister both were the same,  
72 revealing monoclonal T-cell populations (mixed CD4 and CD8 cells). Over 4 weeks,  
73 he deteriorated with progressive pancytopenia, multiple intracranial hemorrhagic  
74 lesions and intractable seizures, demyelinating sensorimotor neuropathy, and other  
75 infections. He did not respond to intensive care-level treatment including  
76 mechanically-assisted ventilation, IV antimicrobials, daclizumab (anti-CD25 mAB),  
77 alemtuzumab, high-dose dexamethasone, and he subsequently died.

78

79 **Case 3: IL3 (C244T/wt)**

80 The patient is male and has been evaluated for familial HLH syndromes since  
81 childhood owing to his family history. He had an unremarkable course. Repeated  
82 CBC, WBC with differential counts, platelet counts, liver function tests and kidney  
83 function tests were normal. Serum IgG, IgA, IgM, IgG subclasses, anti-vaccine  
84 antibody titers, and lymphocyte subsets were normal except for low CD56. PCR for  
85 CMV, EBV, and adenovirus were negative. Between 11 – 16 years of age, he had low  
86 to borderline-normal NK cell numbers (4-5% of lymphocytes) and decreased to  
87 absent NK cell function (average 0.1 L.U.; n=7). CD107a mobilization was normal  
88 (15%; MCF 165 (range 10-37%; MCF 152-986)).

89

90 **Case 4: II. 4 (C244T/C244T)**

91 The patient is male and has been evaluated for familial HLH syndromes since the  
92 age of 8 owing to his family history. He had an unremarkable course except for  
93 persistence of low EBV viremia (64-562 copies/ $\mu$ g) for 5 years. PCR for CMV and  
94 adenovirus were negative. Between 7 - 12 years of age, his NK cell numbers were  
95 normal (7-15% of lymphocytes), with decreased to absent NK cell function (average  
96 L.U. <0.3; n=7). CD107a mobilization upon activation was low (10%; MCF114 (range  
97 10-37%; MCF 152-986)).

98

99 **Case 5: IL5 (C244T/C244T)**

100 The patient is male and has been evaluated for familial HLH syndromes since the  
101 age of 5 owing to his family history. He had an unremarkable course. Between 6 and  
102 10 years of age, he had EBV viremia (80-932 copies/ $\mu$ g), but PCR for CMV and  
103 adenovirus were negative. CMV serology was positive documenting past infection.  
104 His lymphocyte subsets were essentially normal. Between 5 – 10 years of age, his  
105 NK cell numbers were 6-17% of lymphocytes, but NK cell function was decreased to  
106 absent (average L.U. 0.09; n=5). CD107a mobilization upon activation was  
107 decreased (6%; MCF 75 (range 10-37%; MCF 152-986)).

108

**109 Case 6: IL6 (C244T/wt)**

110 The patient is female and has been evaluated for familial HLH syndromes since the  
111 age of 5 owing to his family history. She had an unremarkable course. Repeated CBC,  
112 WBC with differential counts, platelet counts, liver function tests and kidney  
113 function tests were normal. Serum IgG, IgA, IgM, IgG subclasses, anti-vaccine  
114 antibody titers, and lymphocyte subsets were normal. Between 2 and 5 years of age,  
115 she had low EBV viremia (80-219 copies/ $\mu$ g), which has subsequently returned to  
116 undetectable levels. Quantitative studies for CMV and adenovirus were negative.  
117 Between 1 - 5 years of age, her NK cell numbers were normal (5-11% of  
118 lymphocytes) and NK cell function was absent to borderline-normal (average 0.9  
119 L.U.; n=3). CD107a mobilization upon activation was normal (14%; MCF 206 (range  
120 10-37%; MCF 152-986)).  
121

122 **Case 7: IL7 (C244T/wt):**

123 The patient is male and has been evaluated for familial HLH syndromes since birth  
124 owing to his family history. He had an unremarkable course. Immunological studies  
125 were normal, as were quantitative tests for adenovirus, CMV, and EBV in the  
126 peripheral blood. At 2 years of age, NK cell frequency was 13% of lymphocytes, but  
127 NK cell function was decreased to absent (average 1.0 L.U.; n=2) with decreased  
128 CD107a mobilization upon activation (9%; MCF 149 (range 11-35%; MCF 207-678).  
129



130 **Supplemental figure legend**

131 **Figure E1:** NK cell mediated cytotoxicity is partially rescued by interleukin (IL)-2.  
132 Lytic units as number of NK cells  $\times 10^7$  required to mediate 20% of the target cell  
133 lysis were used as a measurement of the cytolytic capacity and were determined as  
134 described previously (1). PBMCs from a healthy control and the patients were either  
135 untreated (white bars) or incubated with IL-2 30 min prior to the standard 4h  
136  $^{51}$ chromium release assay against K562 target cells (black bars) (n=2).

137

138 **Supplemental References**

- 139 1. Orange JS, Chehimi J, Ghavimi D, Campbell D, Sullivan KE. Decreased natural killer  
140 (NK) cell function in chronic NK cell lymphocytosis associated with decreased  
141 surface expression of CD11b. *Clinical Immunology*. 2001;99(1):53-64.

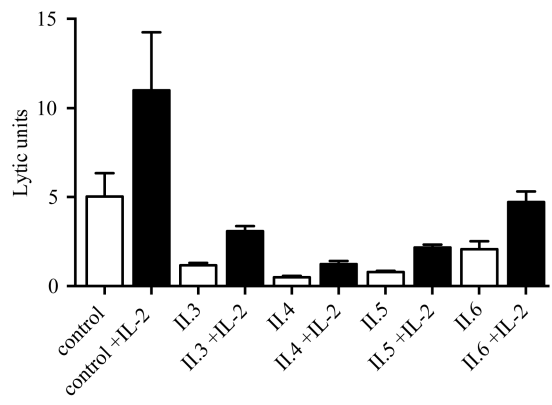

Supplement: NIHMS763195-supplement-01.pdf [file NIHMS763195-supplement-01.pdf]
